# Supplementary material for: Epigenomic mapping reveals distinct B cell acute lymphoblastic leukemia chromatin architectures and regulators
Source: PubMed Central journal article supplement (PMC10726428; doi:10.1016/j.xgen.2023.100442), 2023-11-20

**SUPPLEMENTAL DATA 1: Differential TF footprint scores at subtype-enriched and subtype-depleted DAS, related to Figure 5.** Differential footprint score between subtype and non-subtype samples. Differential footprint score between merged B-ALL subtype and merged B-ALL non-subtype patient samples is provided on the x-axis and TF footprint significance is provided on the y-axis. Higher differential footprint scores indicate higher binding in the merged subtype group compared to all other merged non-subtype samples. TPM transcript abundance of associated TF transcript for merged subtype groups are shown as both color and size of points. Data is shown for enriched (top) and depleted (bottom) DAS specific to each subtype.

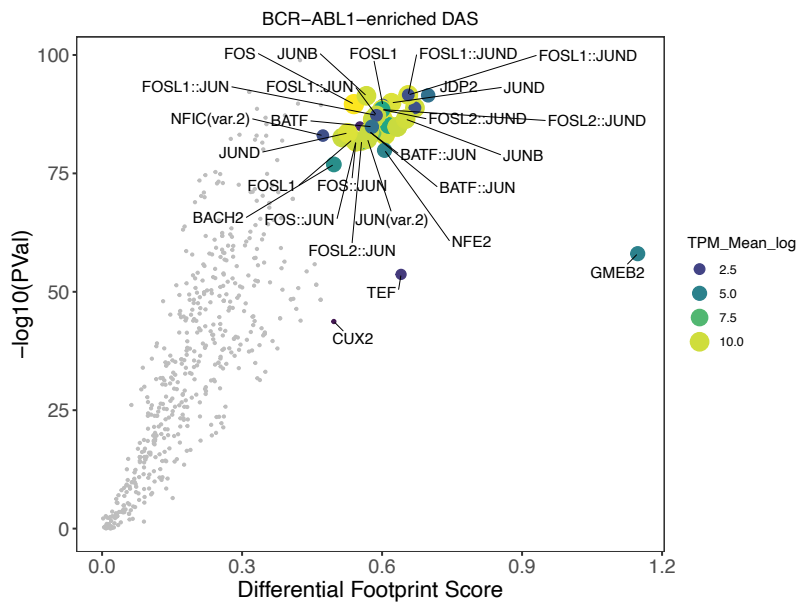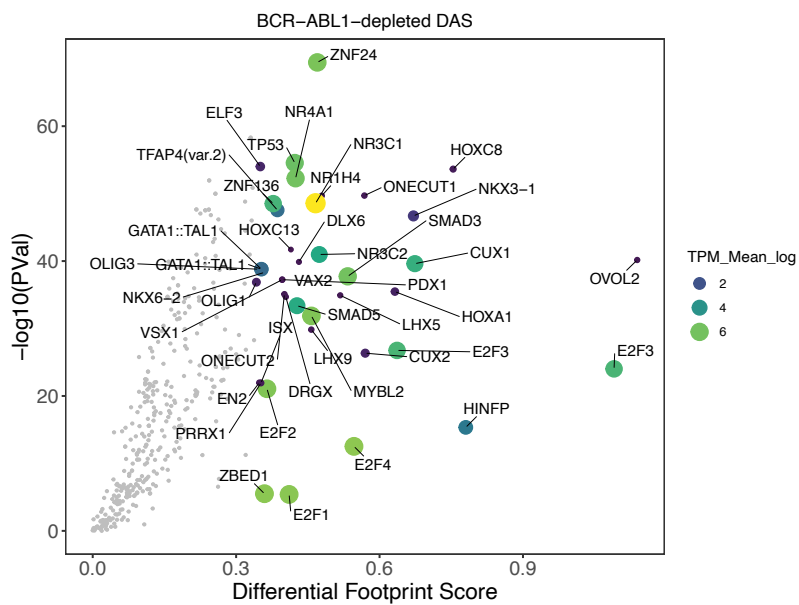

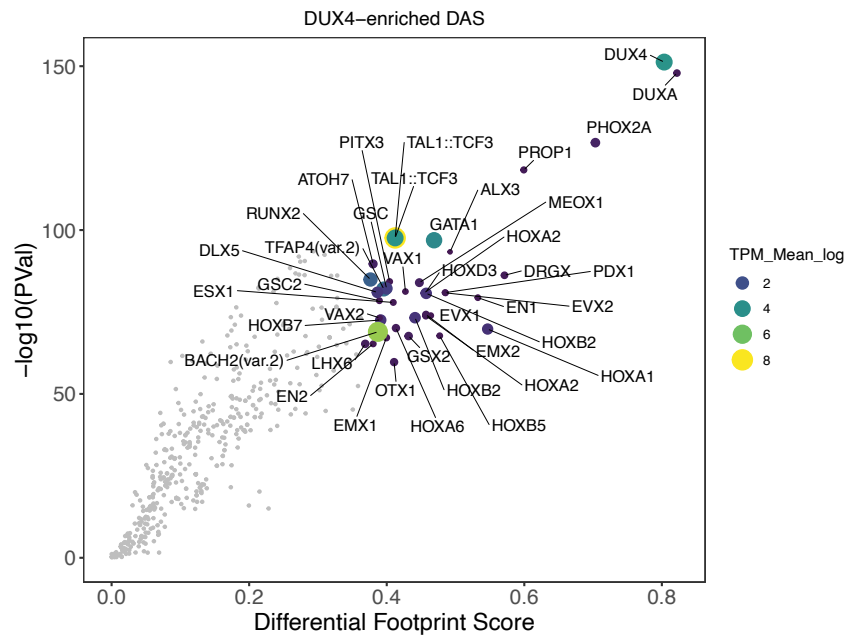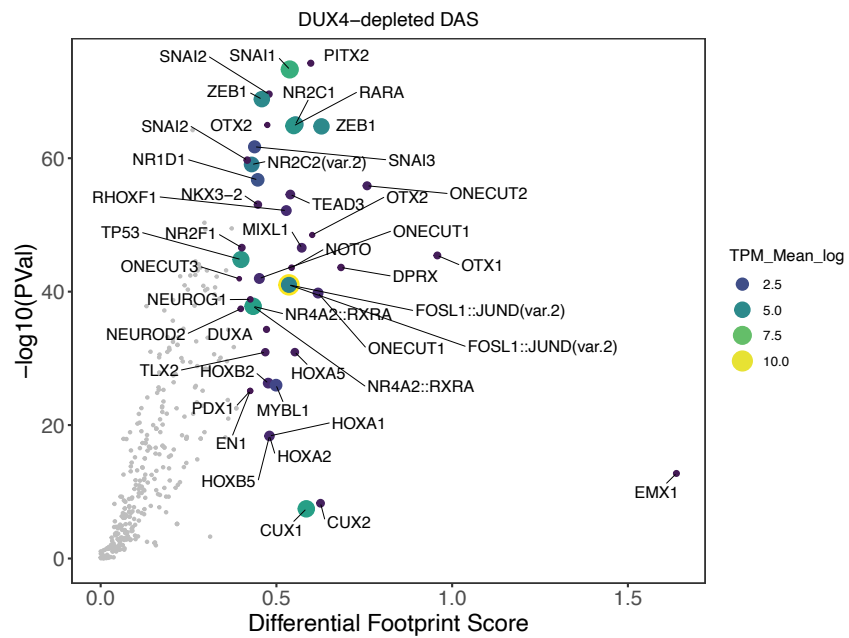

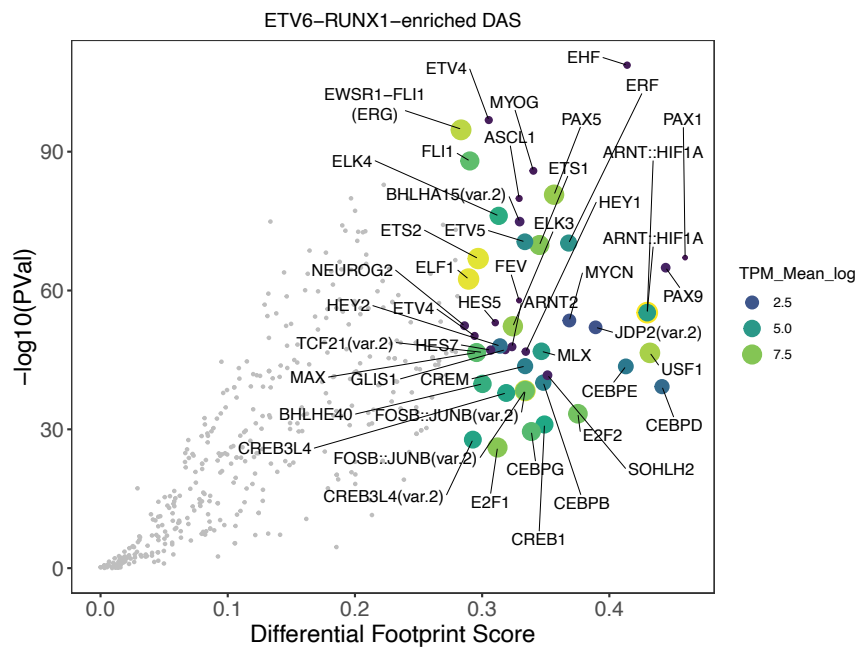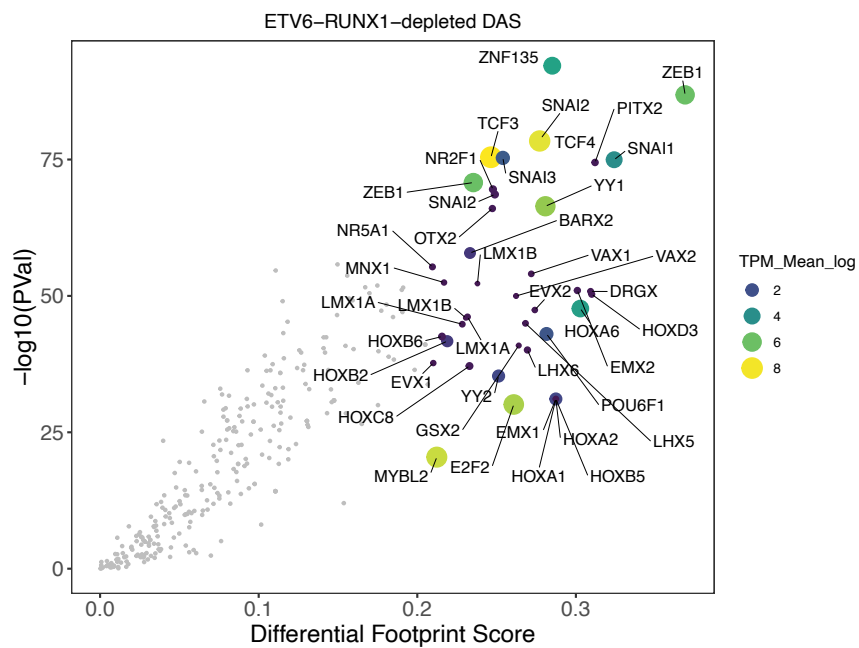

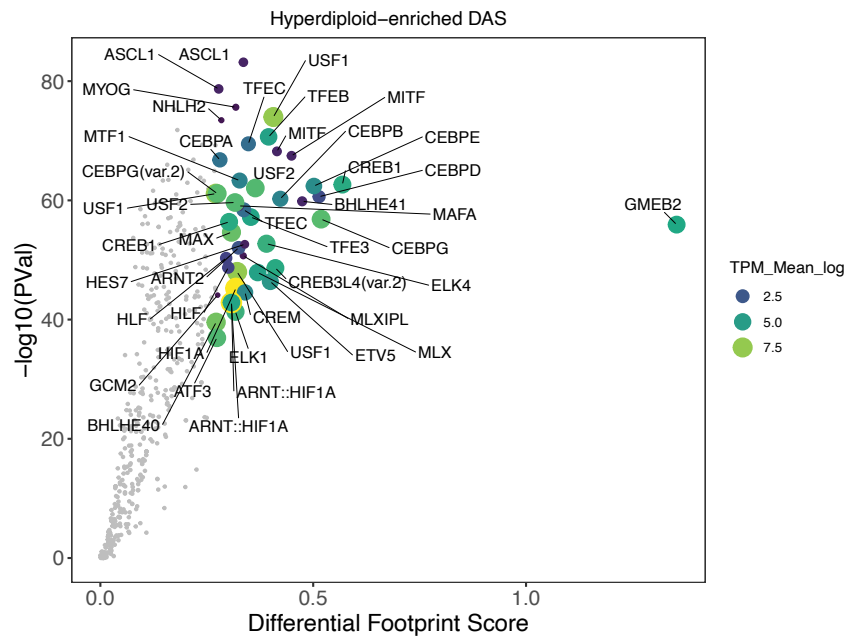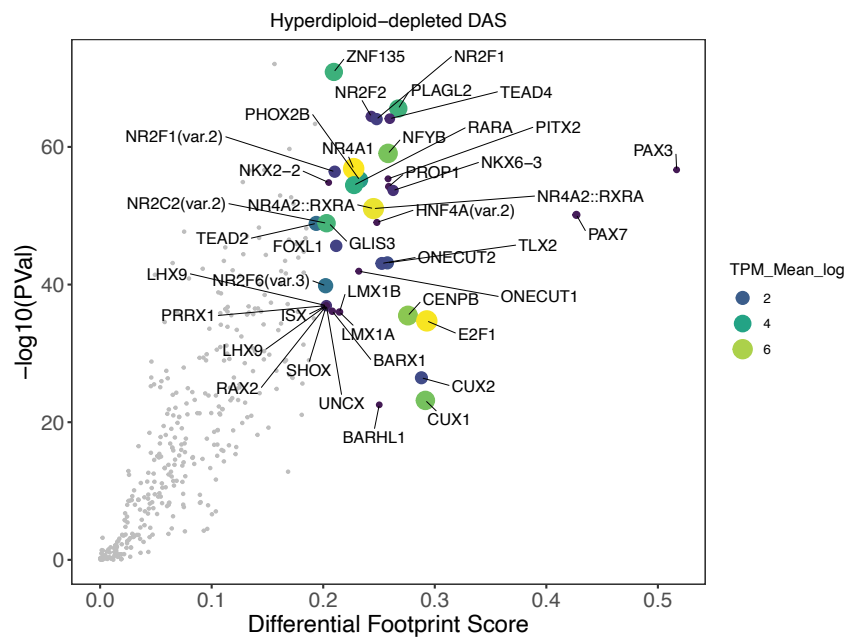

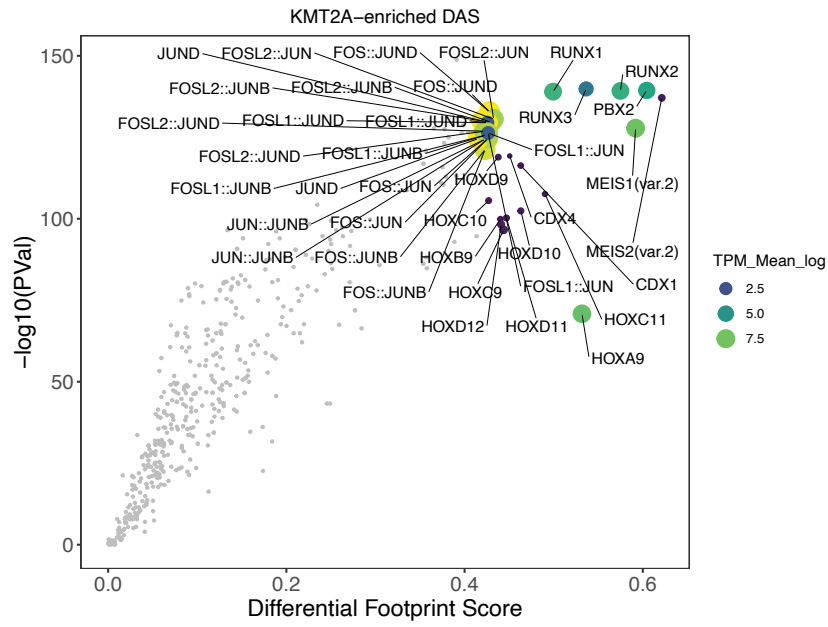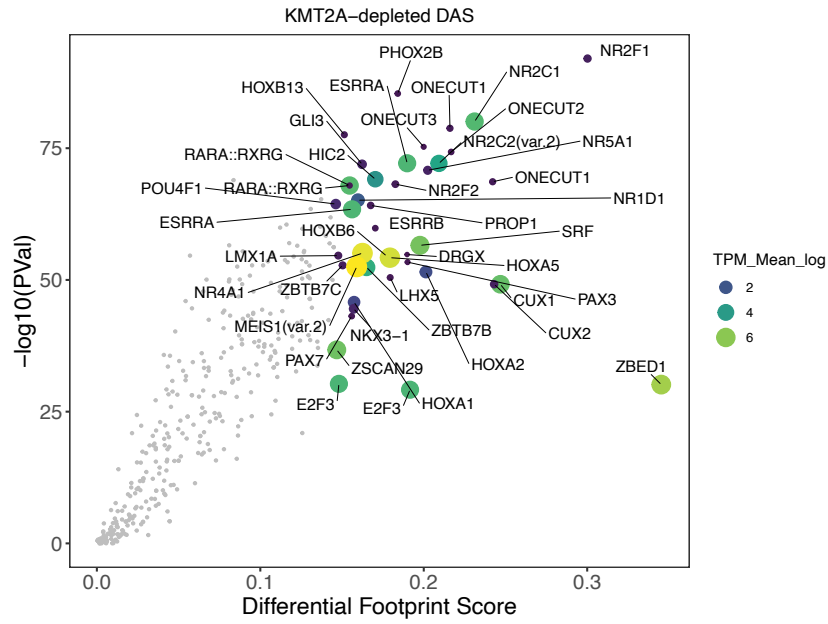

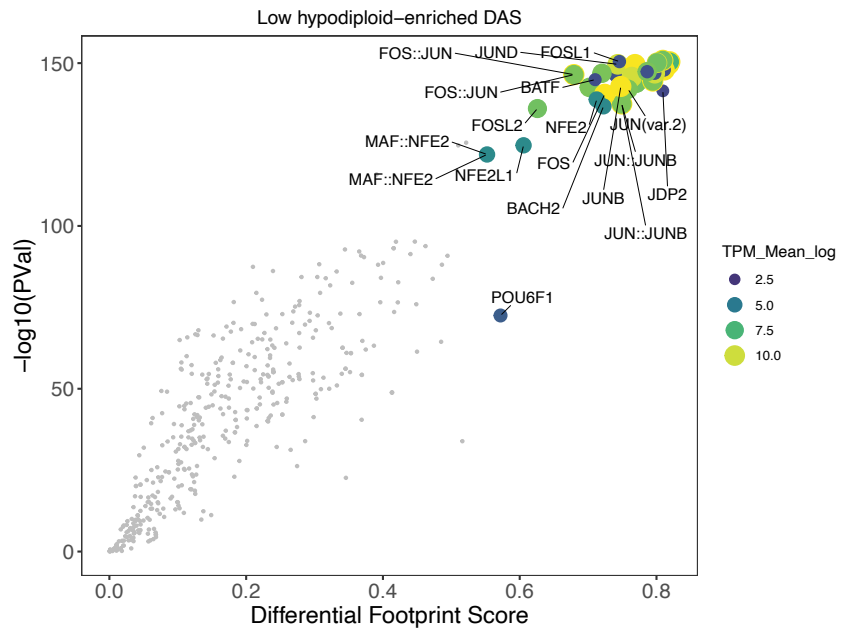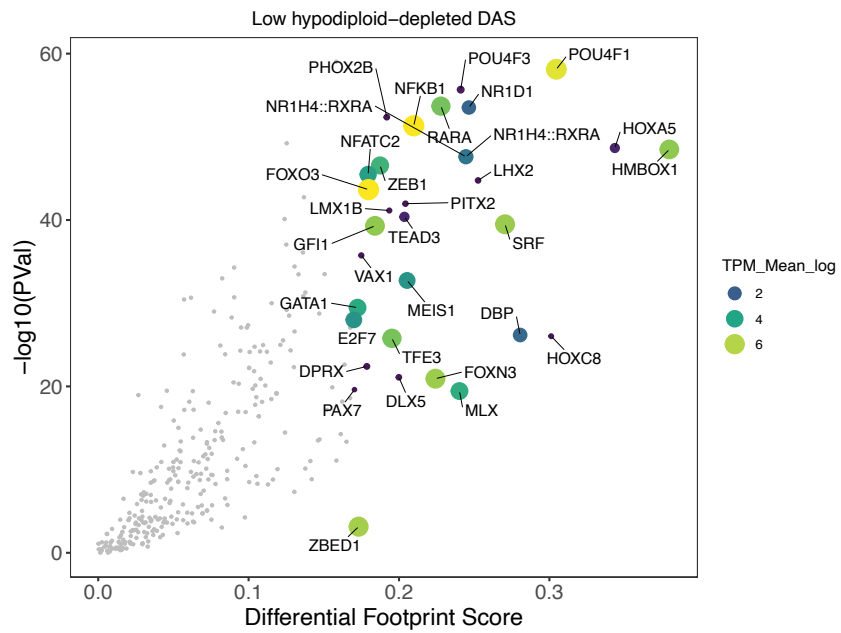

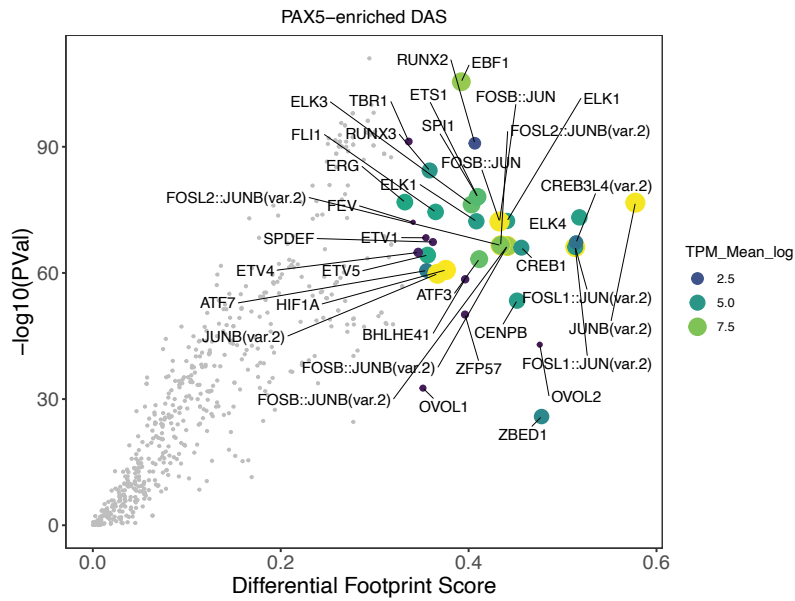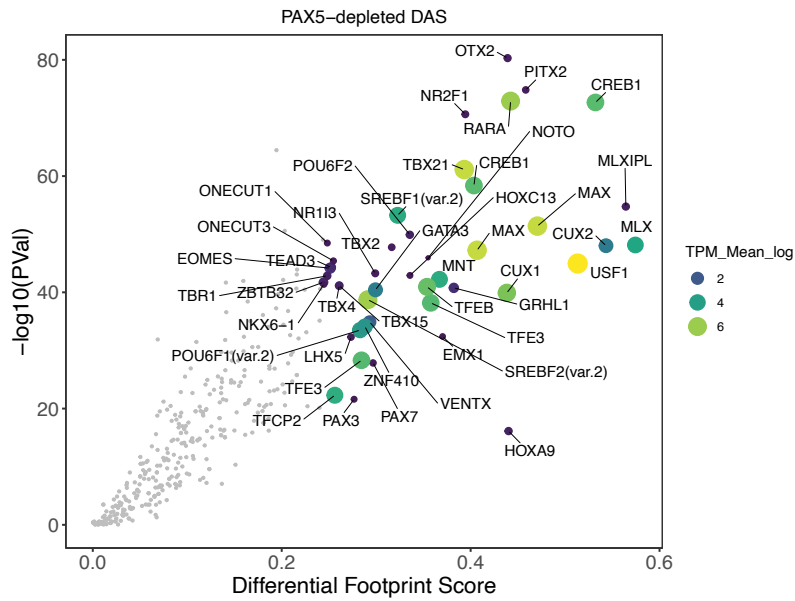







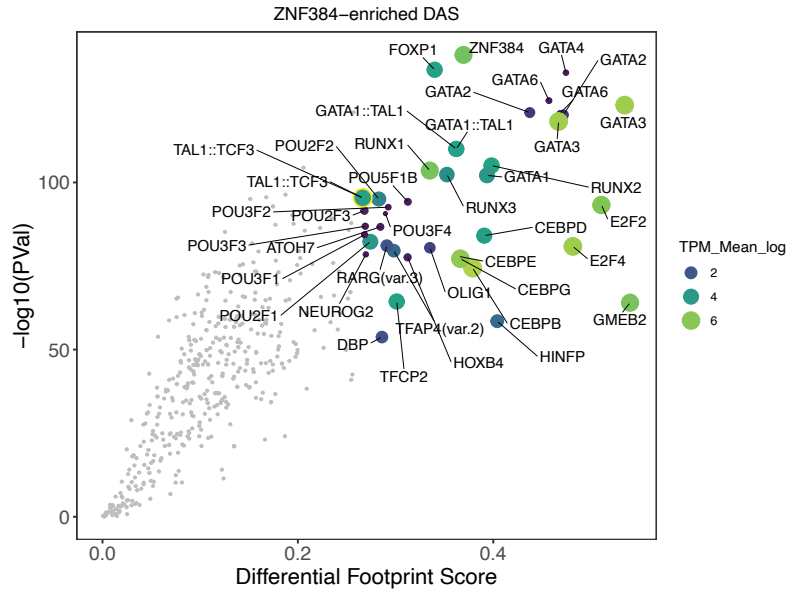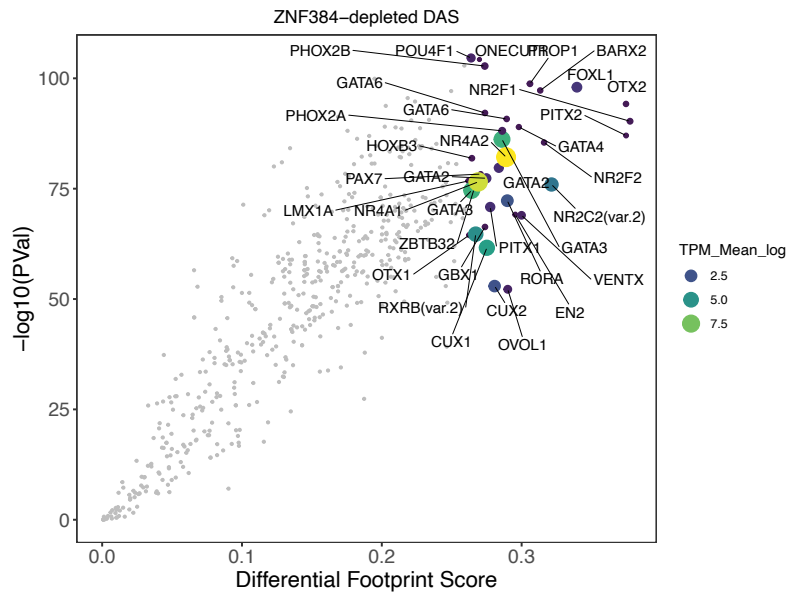

Supplement: mmc2.pdf [file mmc2.pdf]
