# Supplementary material for: Epigenomic mapping reveals distinct B cell acute lymphoblastic leukemia chromatin architectures and regulators
Source: PubMed Central journal article supplement (PMC10726428; doi:10.1016/j.xgen.2023.100442), 2023-11-20
Supplement: mmc1.pdf [file mmc1.pdf]

**Supplemental information**

**Epigenomic mapping reveals distinct B cell acute**

**lymphoblastic leukemia chromatin**

**architectures and regulators**

**Kelly R. Barnett, Robert J. Mobley, Jonathan D. Diedrich, Brennan P. Bergeron, Kashi Raj Bhattarai, Alexander C. Monovich, Shilpa Narina, Wenjian Yang, Kristine R. Crews, Christopher S. Manring, Elias Jabbour, Elisabeth Paietta, Mark R. Litzow, Steven M. Kornblau, Wendy Stock, Hiroto Inaba, Sima Jeha, Ching-Hon Pui, Charles G. Mullighan, Mary V. Relling, Shondra M. Pruett-Miller, Russell J.H. Ryan, Jun J. Yang, William E. Evans, and Daniel Savic**

# Supplemental Information

## **Epigenomic mapping reveals distinct B-cell acute lymphoblastic leukemia chromatin architectures and regulators**

Kelly R. Barnett, PhD, Robert J. Mobley, PhD, Jonathan D. Diedrich, PhD, Brennan P. Bergeron, PhD, Kashi Raj Bhattarai, PhD, Alexander C. Monovich, Shilpa Narina, Wenjian Yang, PhD, Kristine R. Crews, PharmD, Christopher S. Manring, MBA, Elias Jabbour, MD, Elisabeth Paietta, PhD, Mark R. Litzow, MD, Steven M. Kornblau, MD, Wendy Stock, MD, Hiroto Inaba, MD, PhD, Sima Jeha, MD, Ching-Hon Pui, MD, Charles G. Mullighan, MBBS (Hons), MSc, MD, Mary V. Relling, PharmD, Shondra M Pruett-Miller, PhD, Russell J.H. Ryan, Jun J. Yang, PhD, William E. Evans, PharmD and Daniel Savic, PhD

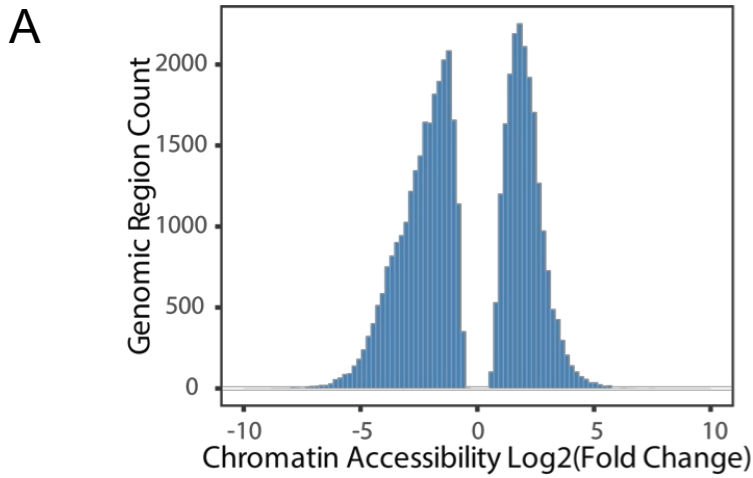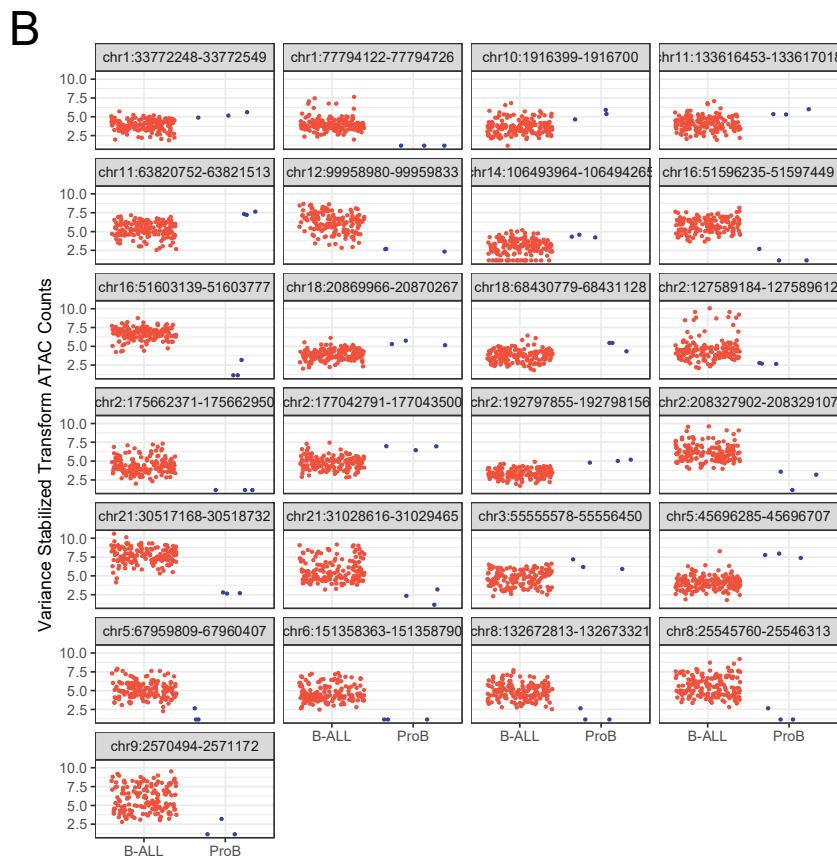

**Figure S1: Analysis of differential accessibility between Pro-B cells and B-ALL, related to Figure 3. (A) Histogram of log<sub>2</sub>-adjusted fold change in ATAC-seq signal at significant DAS between Pro-B cells and B-ALL patient samples. (B) DESeq2 variance stabilized ATAC-seq counts for individual peaks between B-ALL patient samples (red, left) and ProB cell samples (blue, right).**

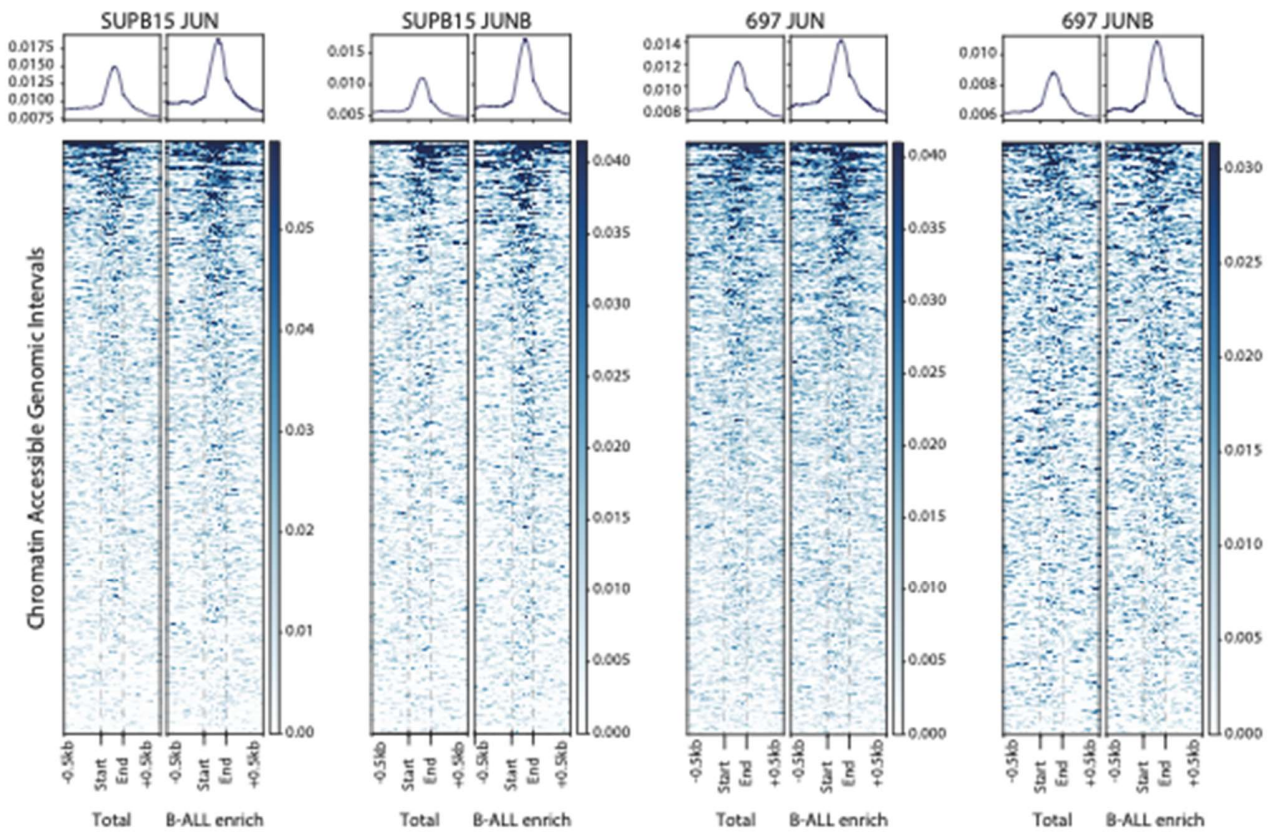

**Figure S2: JUN and JUNB CUT and RUN read enrichment at B-ALL accessible chromatin sites, related to Figure 3.** JUN and JUNB CUT and RUN enrichment heatmap at all B-ALL accessible chromatin sites (Total, N=217,240 regions; left) and B-ALL enriched DAS (B-ALL enrich, N = 23,372; right) in SUPB15 and 697 cells is shown. Dotted lines define chromatin accessible peak intervals. Genomic intervals +/- 5 kilobases from peaks are shown for context. Rows in adjacent pairs of heatmaps are unaligned.

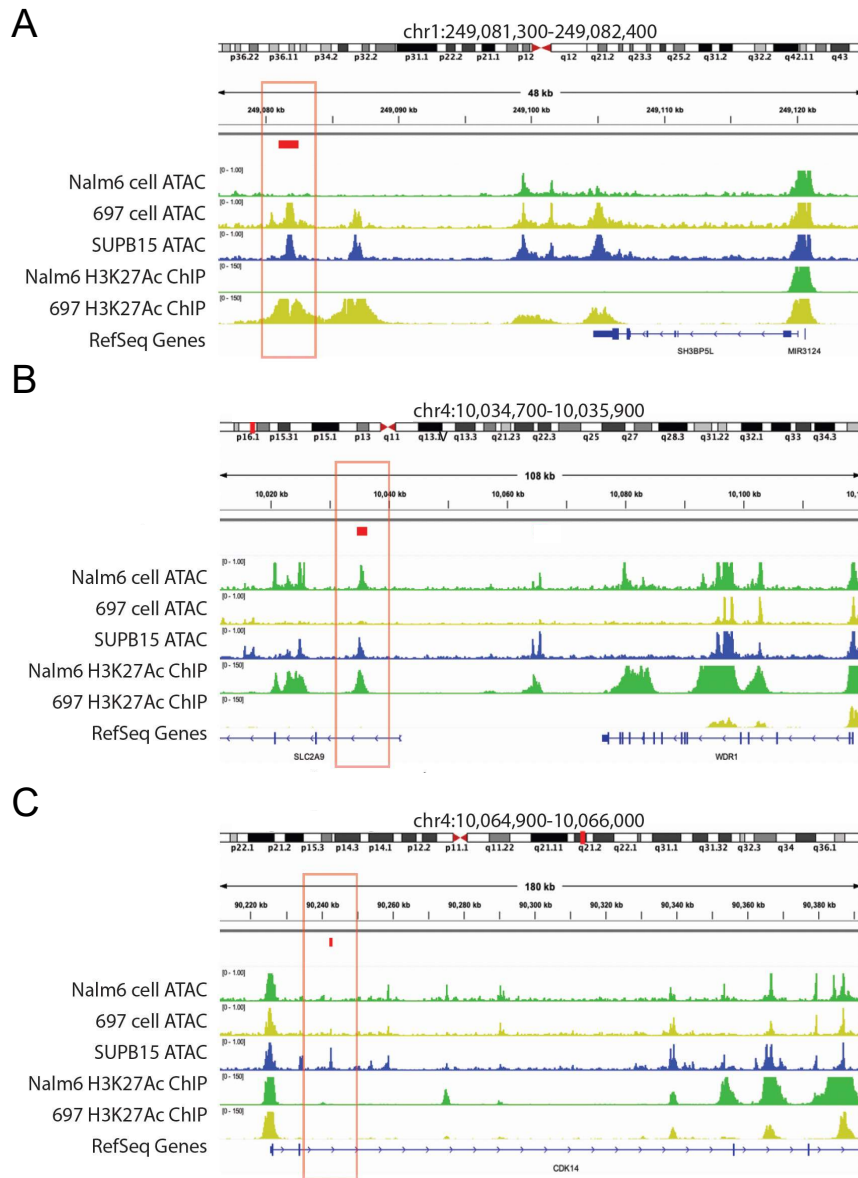

**Figure S3: Genome browser images of *cis*-regulatory elements targeted for deletion using CRISPR-Cas9 genome editing, related to Figure 3.** Genome browser views of B-ALL cell line ATAC-seq and H3K27Ac ChIP-seq across loci targeted for CRISPR-cas9 mediated genomic deletion of B-ALL *cis*-regulatory elements. Coordinates (hg19) for each deletion are provided above and the genomic locations (red rectangles and outlined in red) are provided in each browser image for *cis*-regulatory element deletions near *SH3BP5L* (A), *SLC2A9* (B) and *CDK14* (C).

**A**

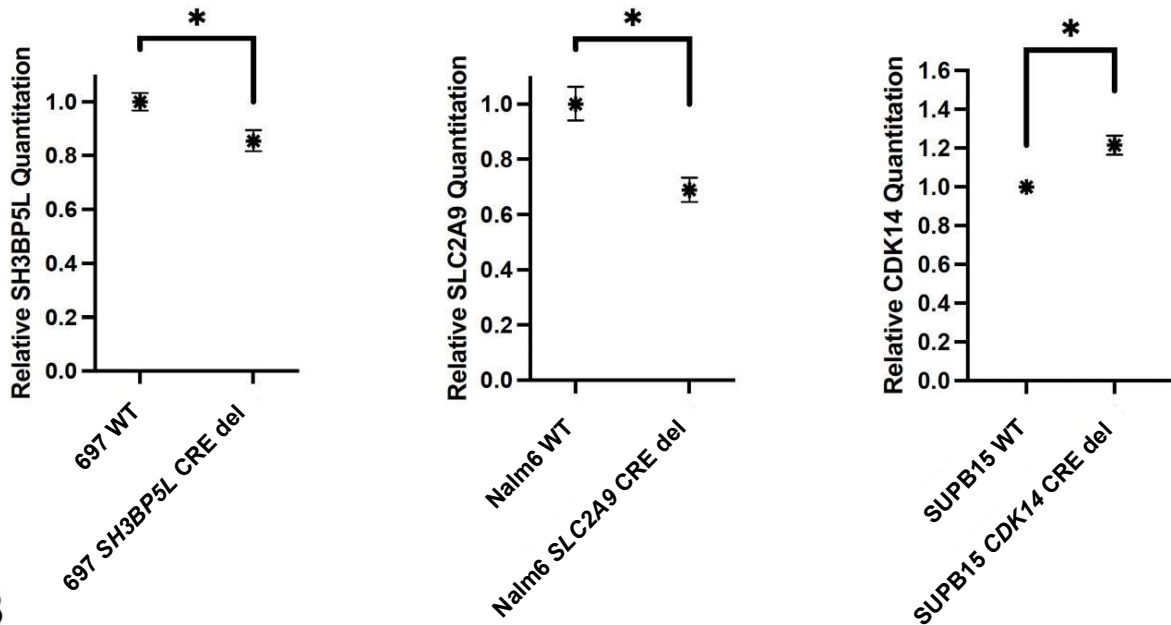

**B**

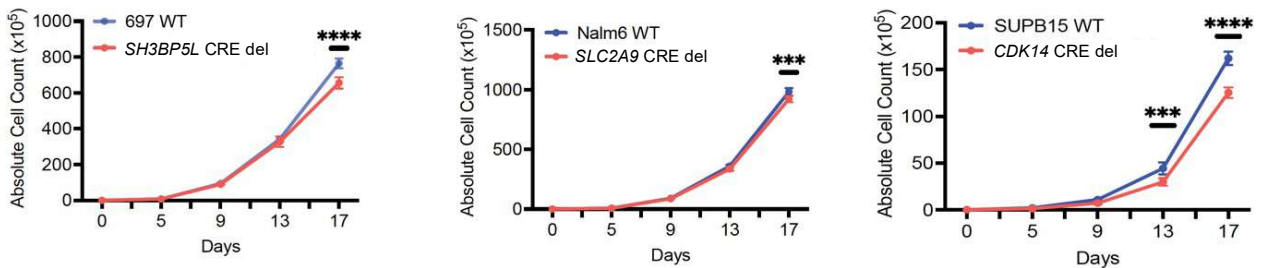

**Figure S4: *Cis*-regulatory element deletion effects on gene expression and cell proliferation, related to Figure 3. (A)** RT-qPCR analysis of nearby gene expression within heterogeneous CRISPR-Cas9 deletion cell pools targeting putative B-ALL *cis*-regulatory elements (n=3 per sample). **(B)** Cell proliferation analysis of WT B-ALL cells or B-ALL cells deleted for putative B-ALL *cis*-regulatory elements (n=3 per sample). Experiments were performed in 697 (*SH3BP5L*), Nalm6 (*SLC2A9*) and SUPB15 (*CDK14*) cells.



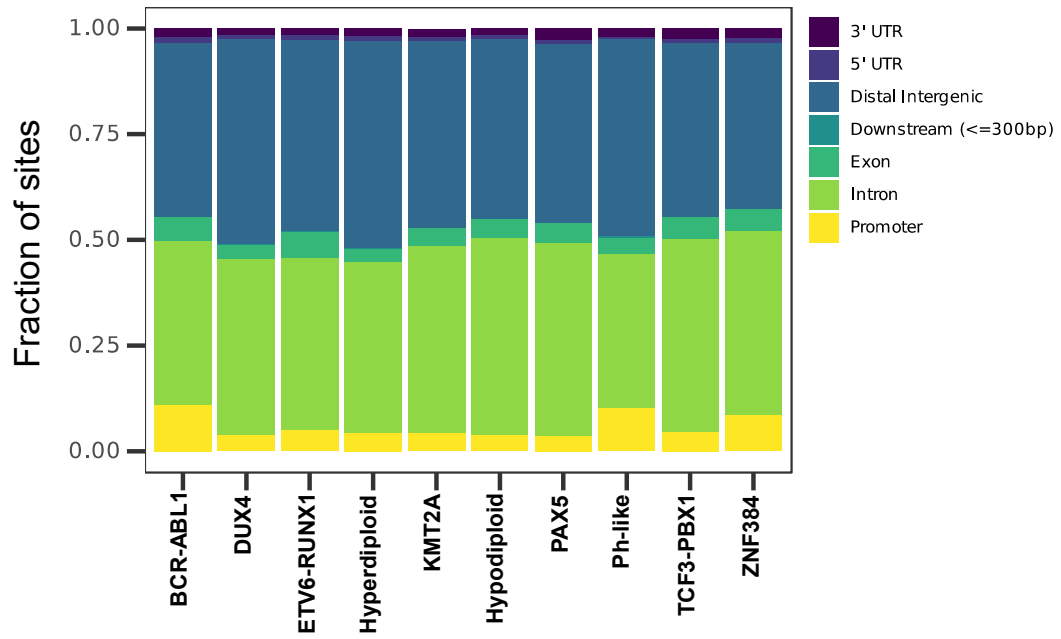

**Figure S6: Genomic distributions of subtype-enriched DAS, related to Figure 4.** Genomic annotations of subtype-enriched DAS for each B-ALL subtype.



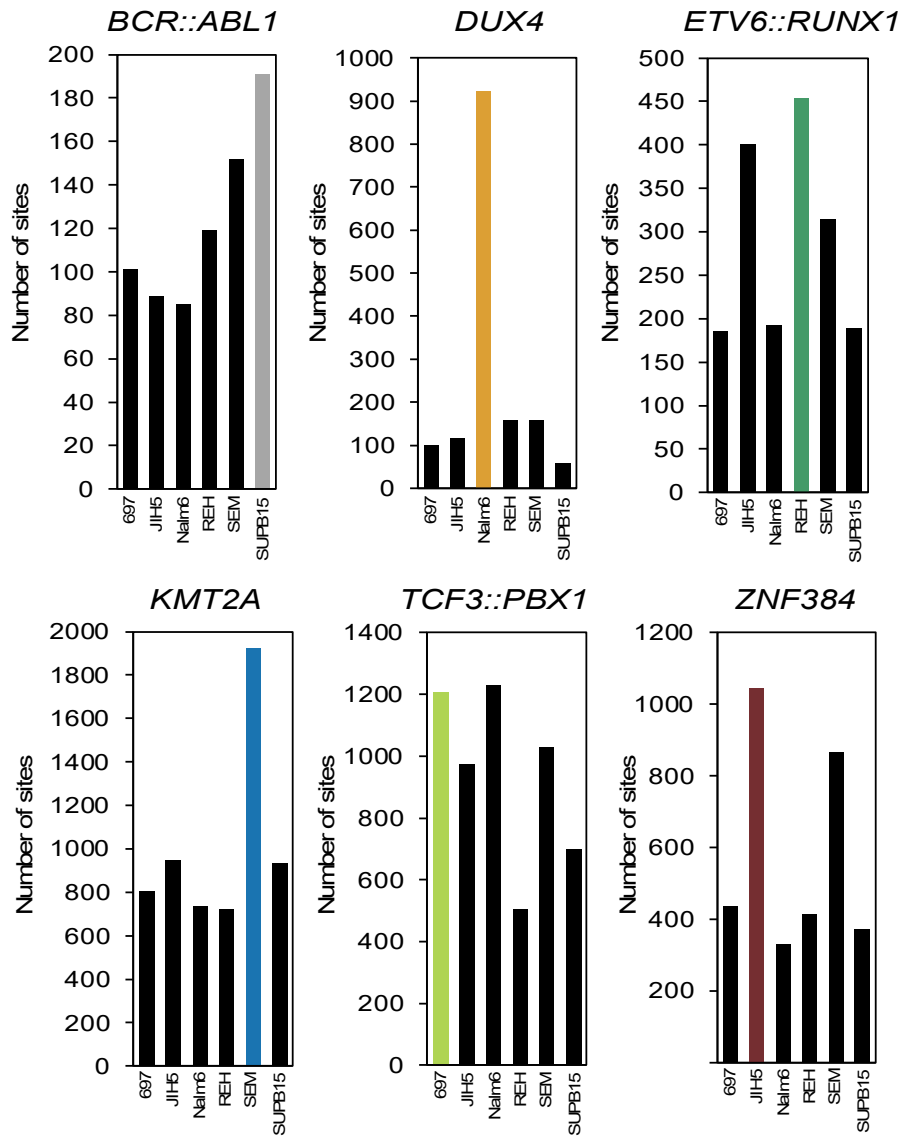

**Figure S7: Comparisons of subtype-enriched DAS across diverse B-ALL cell lines, related to Figure 4.** Across a panel of B-ALL cell lines (697, JIH5, Nalm6, REH, SEM and SUP-B15; x-axis), bar plots delineate the number of (from left to right) *BCR::ABL1*, *DUX4*-rearranged (*DUX4*), *ETV6::RUNX1*, *KMT2A*-rearranged (*KMT2A*), *TCF3::PBX1* and *ZNF384*-rearranged (*ZNF384*) DAS that exhibit the strongest accessibility in each B-ALL cell line. Color denotes the corresponding B-ALL cell line for each subtype-enriched DAS and black denotes B-ALL cell lines from opposing subtypes.

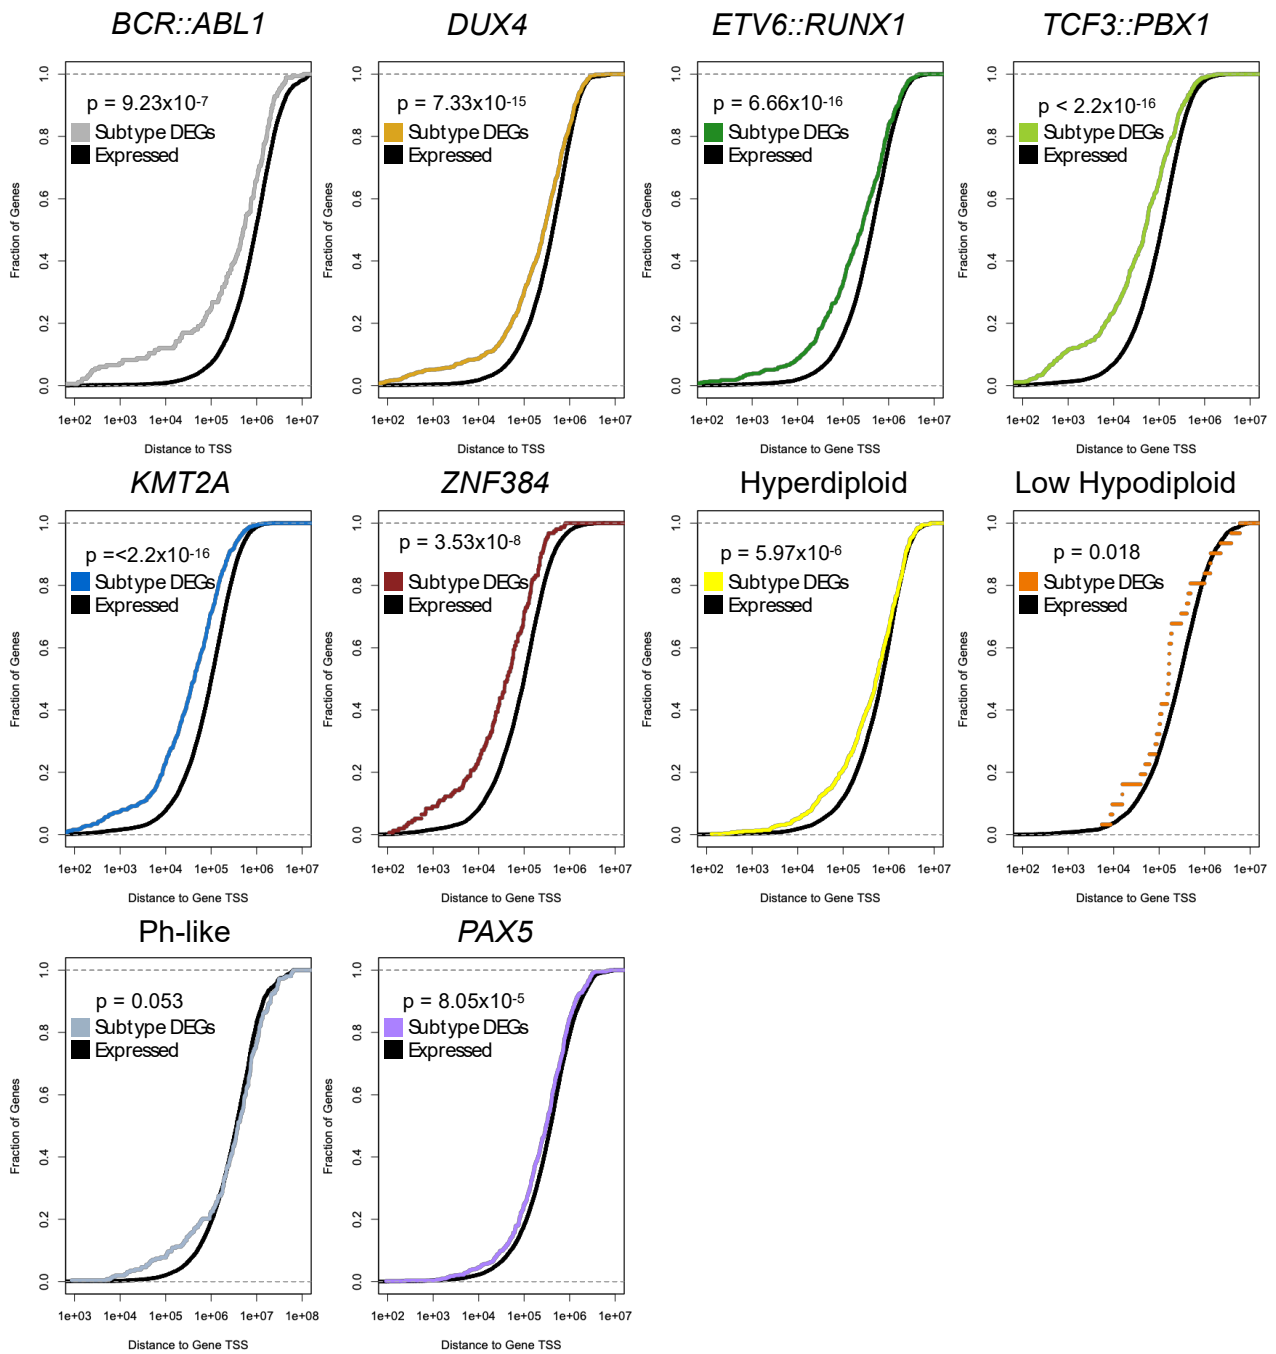

**Figure S8: Distance comparisons of subtype-enriched DAS with DEGs uniquely up-regulated in each subtype, related to Figure 4.** Cumulative distribution function comparing the fraction (y-axis) of subtype up-regulated genes (Subtype DEGs; red) and all expressed subtype gene (Expressed genes; black) at different distance cutoffs from subtype-enriched DAS and their transcription start sites (x-axis). Kolmogorov-Smirnov (K-S) p-values are provided for each B-ALL subtype.

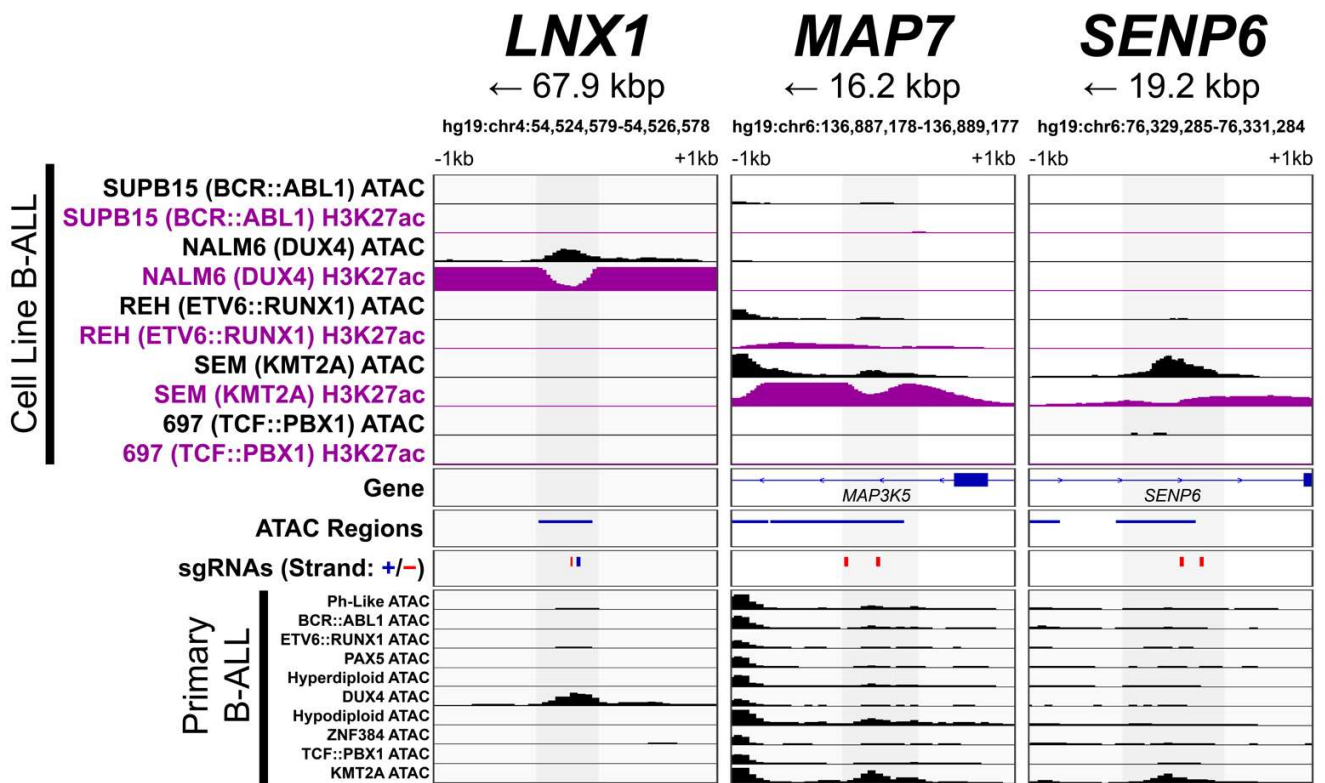

**Figure S9: Genome browser images of *cis*-regulatory elements targeted by CRISPRi, related to Figure 4.** Detail (2,000 bp window) of putative enhancer *cis*-regulatory element regions targeted with dCas9-KRAB CRISPRi. Cell line ATAC-seq and H3K27ac ChIP-seq for representative enhancers with subtype-specific enrichment. Distance and position with respect to target gene are listed at the top with associated B-ALL subtype in parentheses. Cell line H3K27ac ChIP-seq tracks are shown in purple (scale, 15 fragments per million, fpm) and ATAC-seq tracks in black (scale 7.5 fpm). Subtype ATAC-seq tracks merged from primary B-ALLs are shown in black (scale 2 fpm). The position of sgRNA sequences used in X. are shown (blue = positive strand, red = negative strand).

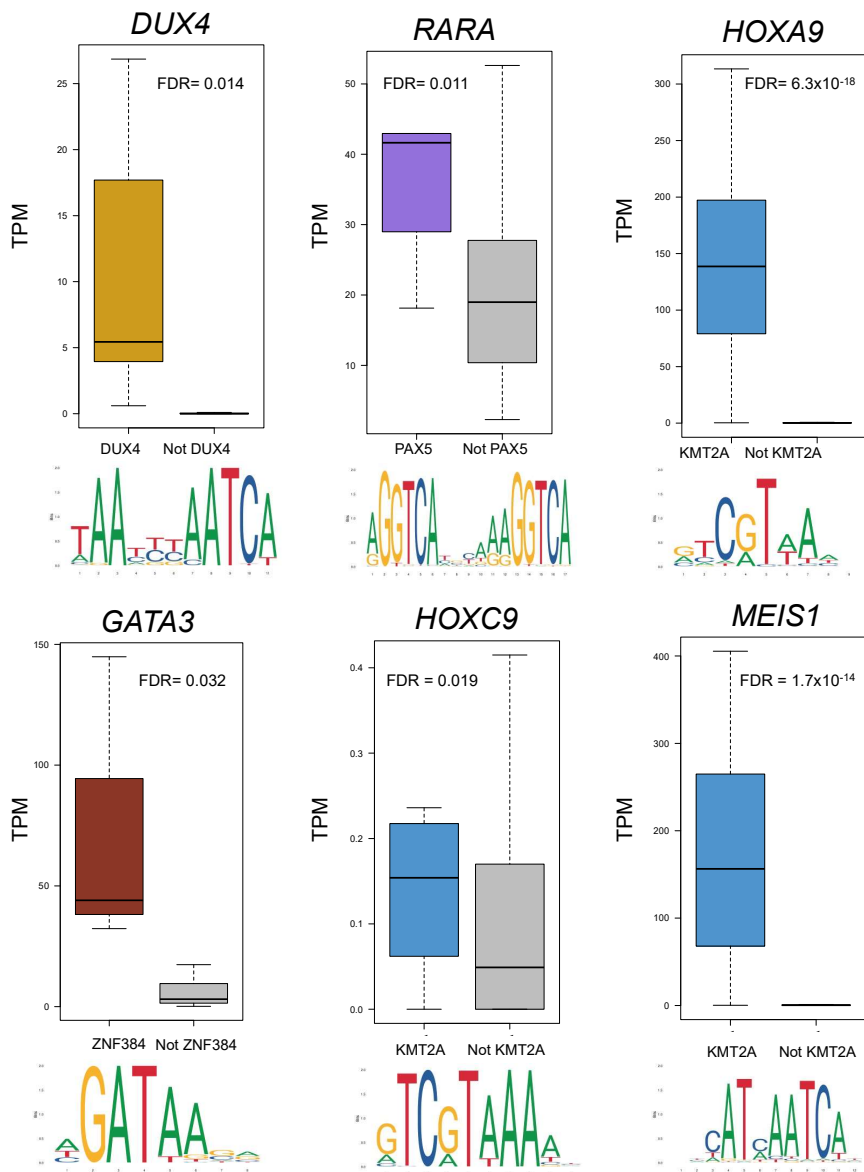

**Figure S10: Gene expression of TFs harboring subtype-enriched footprints, related to Figure 5.** RNA-seq transcripts per million (TPM) expression of key TFs with subtype-enriched footprints that are also up-regulated in the corresponding subtype (in red) versus all other subtypes (gray). DESeq2 differentially expressed gene FDR significance values are provided.

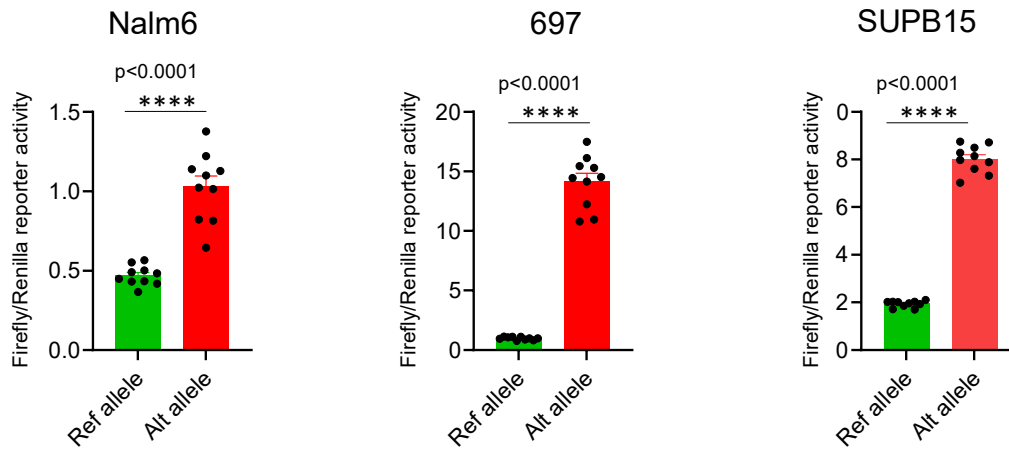

**Figure S11: Luciferase reporter assay analysis of rs17481869, related to Figure 7.** Firefly luciferase reporter plasmid activity for SNP rs17481869 comparing reference allele and alternative allele in Nalm6 (left), 697 (center) and SUPB15 (right) B-ALL cell lines. Firefly luciferase signal is normalized to renilla luciferase control.

| <b>Name</b>                     | <b>Sequence (5' to 3')</b>                       |
|---------------------------------|--------------------------------------------------|
| <b>SLC2A9 deletion in Nalm6</b> |                                                  |
| CAGE2667.SLC2A9.g7 spacer       | UACAUGAGCGCACCCACGCA                             |
| CAGE2668.SLC2A9.g1 spacer       | GAGACUCCUCAGCACGUGAA                             |
| CAGE2667.SLC2A9.F               | CTACACGACGCTCTTCCGATCTtcaccatctccaaggcaaaccctg   |
| CAGE2668.SLC2A9.R               | CAGACGTGTGCTCTTCCGATCTgacctaaccctgacatgggcaagt   |
| <b>CDK14 deletion in SUPB15</b> |                                                  |
| CAGE2657.CDK14.g9 spacer        | UUUUAGACCUCUUGCAUGGA                             |
| CAGE2658.CDK14.g6 spacer        | UUAUAUUGCUGGGUUGUGAU                             |
| CAGE2657.CDK14.F                | CTACACGACGCTCTTCCGATCTtacttctgtactgtttttttcactgt |
| CAGE2658.CDK14.R                | CAGACGTGTGCTCTTCCGATCTgaatctatggtccagtctgagaaa   |
| <b>SH3BP5L deletion in 697</b>  |                                                  |
| CAGE2665.SH3BP5L.g2 spacer      | AUCCAU AUGUUAUUAAGGGU                            |
| CAGE2666.SH3BP5L.g5 spacer      | UAAAGACAGAUUGAGAUUCC                             |
| CAGE2665.SH3BP5L.F              | CTACACGACGCTCTTCCGATCTaaccctcagacactccatgaggccc  |
| CAGE2666.SH3BP5L.R              | CAGACGTGTGCTCTTCCGATCTccaggaggctcaagagaagacgtca  |

**Table S10: List of nucleic acid sequences used for CRISPR-Cas9 deletions, related to STAR Methods.**

| Name                                                    | Sequence (5' to 3')        |
|---------------------------------------------------------|----------------------------|
| <b><i>LNX1</i> CRE CRISPRi silencing in Nalm6 cells</b> |                            |
| F_RRG421_LNX1_enh                                       | CACCGAATAATGCACCACAGTGAGG  |
| R_RRG421_LNX1_enh                                       | AAACCCTCACTGTGGTGCATTATTC  |
| F_RRG422_LNX1_enh                                       | CACCGAGCATTTCATCTGGTAAACCG |
| R_RRG422_LNX1_enh                                       | AAACCGGTTTACCAGATGAATGCTC  |
| LNX1 enh qPCR primer F                                  | CAGTCGCTTGAAGAGGTGTG       |
| LNX1 enh qPCR primer R                                  | GAGGGTGCAGTAGGTGTGTC       |
| <b><i>MAP7</i> CRE silencing in SEM cells</b>           |                            |
| F_RRG423_MAP7_enh                                       | CACCGAAAATGCTAGTTATTCACCA  |
| R_RRG423_MAP7_enh                                       | AAACTGGTGAATAACTAGCATTTTC  |
| F_RRG424_MAP7_enh                                       | CACCGTTTGCTAGCATAGAACCAC   |
| R_RRG424_MAP7_enh                                       | AAACGTGGGTTCTATGCTAGCAAAC  |
| MAP7 enh qPCR primer F                                  | GCAGTGCGAAGCGAAACAG        |
| MAP7 enh qPCR primer R                                  | CAGCTTCGTGGCGTTCTTTG       |
| <b><i>SENP6</i> CRE silencing in SEM cells</b>          |                            |
| F_RRG427_SENP6_enh                                      | CACCGAATAAAGTACATCCACCCCA  |
| R_RRG427_SENP6_enh                                      | AAACTGGGGTGGATGTACTTTATTC  |
| F_RRG428_SENP6_enh                                      | CACCGTGAAAACCAGACAAGCTGAA  |
| R_RRG428_SENP6_enh                                      | AAACTTCAGCTTGTCTGGTTTTTAC  |
| SENP6 enh qPCR primer F                                 | AACAGCAGCCCAAAGCAGTC       |
| SENP6 enh qPCR primer R                                 | AGGCTCCACTTGTGATTCCG       |

**Table S11: List of sgRNA and qPCR primer sequences used for CRISPRi, related to STAR Methods.**

| Name                         | Coordinates (hg19)       | Sequence                                                                                                                                                                                                                                                                                                                                 |
|------------------------------|--------------------------|------------------------------------------------------------------------------------------------------------------------------------------------------------------------------------------------------------------------------------------------------------------------------------------------------------------------------------------|
| <b>rs17481869 Ref allele</b> | chr2:146124304-146124604 | CTGCAATGAGTCAAGTGATTGATTTTCATAAACTAAATTAG<br>AAACTTTTAAATTTTATTTTATTTTGGCAAAGCTGGCCTT<br>TTATAAAATGTAAGCATCTGGGCTAGAACTTTTTGATTT<br>CTTGAATTTATGATTTTCTTTTATGCTTCCCTAGGCCTTA<br>AGTGAAGAAAACAGGAAAGAGGCCTCCCAGAGGTGGAA<br>GTTGTATTGTAAAAAGTGGTCTTATGTTTTAAGATAACTT<br>GTGGGAATGATAGGAAGGATGTGAATAGGCATCCCTTG<br>TTTTTGTGAGTTCGTTTTTTCAGA |
| <b>rs17481869 Alt allele</b> | chr2:146124304-146124604 | CTGCAATGAGTCAAGTGATTGATTTTCATAAACTAAATTAG<br>AAACTTTTAAATTTTATTTTATTTTGGCAAAGCTGGCCTT<br>TTATAAAATGTAAGCATCTGGGCTAGAACTTTTTGATTT<br>CTTGAATTTATGATTTTCTTTTATGCTTCACTAGGCCTTA<br>AGTGAAGAAAACAGGAAAGAGGCCTCCCAGAGGTGGAA<br>GTTGTATTGTAAAAAGTGGTCTTATGTTTTAAGATAACTT<br>GTGGGAATGATAGGAAGGATGTGAATAGGCATCCCTTG<br>TTTTTGTGAGTTCGTTTTTTCAGA |

**Table S12: Tested luciferase reporter assay DNA sequences centered on rs17481869, related to STAR Methods.**
